# Supplementary material
Source: PubMed Central journal article supplement (PMC6265076)
Supplement: NIHMS1506141-supplement-2.pdf [file NIHMS1506141-supplement-2.pdf]

## Reporting Summary

Nature Research wishes to improve the reproducibility of the work that we publish. This form provides structure for consistency and transparency in reporting. For further information on Nature Research policies, see [Authors & Referees](#) and the [Editorial Policy Checklist](#).

### Statistical parameters

When statistical analyses are reported, confirm that the following items are present in the relevant location (e.g. figure legend, table legend, main text, or Methods section).

n/a Confirmed

- The exact sample size ( $n$ ) for each experimental group/condition, given as a discrete number and unit of measurement
- An indication of whether measurements were taken from distinct samples or whether the same sample was measured repeatedly
- The statistical test(s) used AND whether they are one- or two-sided  
*Only common tests should be described solely by name; describe more complex techniques in the Methods section.*
- A description of all covariates tested
- A description of any assumptions or corrections, such as tests of normality and adjustment for multiple comparisons
- A full description of the statistics including central tendency (e.g. means) or other basic estimates (e.g. regression coefficient) AND variation (e.g. standard deviation) or associated estimates of uncertainty (e.g. confidence intervals)
- For null hypothesis testing, the test statistic (e.g.  $F$ ,  $t$ ,  $r$ ) with confidence intervals, effect sizes, degrees of freedom and  $P$  value noted  
*Give  $P$  values as exact values whenever suitable.*
- For Bayesian analysis, information on the choice of priors and Markov chain Monte Carlo settings
- For hierarchical and complex designs, identification of the appropriate level for tests and full reporting of outcomes
- Estimates of effect sizes (e.g. Cohen's  $d$ , Pearson's  $r$ ), indicating how they were calculated
- Clearly defined error bars  
*State explicitly what error bars represent (e.g. SD, SE, CI)*

*Our web collection on [statistics for biologists](#) may be useful.*

### Software and code

Policy information about [availability of computer code](#)

Data collection

No computer code was used.

Data analysis

We used Proteome Discoverer 2.0 Mascot engine (ThermoFisher Scientific) for mass spectrometric analysis; Living Image® software (Perkin Elmer, for the Xenogen IVIS-200 imaging system) for bioluminescent image analysis; JASPAR for analysis of transcription factor (TEAD) binding sites on target genes; Olego and Quantas for RNA splicing pattern analysis; and Imaris image analysis software for live imaging analysis.

For manuscripts utilizing custom algorithms or software that are central to the research but not yet described in published literature, software must be made available to editors/reviewers upon request. We strongly encourage code deposition in a community repository (e.g. GitHub). See the Nature Research [guidelines for submitting code & software](#) for further information.

## Data

Policy information about [availability of data](#)

All manuscripts must include a [data availability statement](#). This statement should provide the following information, where applicable:

- Accession codes, unique identifiers, or web links for publicly available datasets
- A list of figures that have associated raw data
- A description of any restrictions on data availability

The data that support the findings of this study are available from the corresponding author upon request. The RNA-Seq data have been deposited at the Gene Expression Omnibus (<https://www.ncbi.nlm.nih.gov/geo/>) under the accession number GSE110239.

## Field-specific reporting

Please select the best fit for your research. If you are not sure, read the appropriate sections before making your selection.

Life sciences  Behavioural & social sciences  Ecological, evolutionary & environmental sciences

For a reference copy of the document with all sections, see [nature.com/authors/policies/ReportingSummary-flat.pdf](https://nature.com/authors/policies/ReportingSummary-flat.pdf)

## Life sciences study design

All studies must disclose on these points even when the disclosure is negative.

|                 |                                                                                                                                                                                                                                             |
|-----------------|---------------------------------------------------------------------------------------------------------------------------------------------------------------------------------------------------------------------------------------------|
| Sample size     | Based on the literature and our previous studies, we chose the sample size routinely used for animal experiments, reporter assays, quantitative PCR, migration and invasion assays, soft agar assays, cell proliferation assays, and ELISA. |
| Data exclusions | No data were excluded.                                                                                                                                                                                                                      |
| Replication     | The experiments were repeated 2-3 times. All replication attempts were successful.                                                                                                                                                          |
| Randomization   | No method of randomization was used.                                                                                                                                                                                                        |
| Blinding        | Investigators were not blinded to group allocation.                                                                                                                                                                                         |

## Reporting for specific materials, systems and methods

### Materials & experimental systems

| n/a                                 | Involved in the study                                           |
|-------------------------------------|-----------------------------------------------------------------|
| <input checked="" type="checkbox"/> | <input type="checkbox"/> Unique biological materials            |
| <input type="checkbox"/>            | <input checked="" type="checkbox"/> Antibodies                  |
| <input type="checkbox"/>            | <input checked="" type="checkbox"/> Eukaryotic cell lines       |
| <input checked="" type="checkbox"/> | <input type="checkbox"/> Palaeontology                          |
| <input type="checkbox"/>            | <input checked="" type="checkbox"/> Animals and other organisms |
| <input checked="" type="checkbox"/> | <input type="checkbox"/> Human research participants            |

### Methods

| n/a                                 | Involved in the study                           |
|-------------------------------------|-------------------------------------------------|
| <input checked="" type="checkbox"/> | <input type="checkbox"/> ChIP-seq               |
| <input checked="" type="checkbox"/> | <input type="checkbox"/> Flow cytometry         |
| <input checked="" type="checkbox"/> | <input type="checkbox"/> MRI-based neuroimaging |

## Antibodies

Antibodies used

Anti-pan-TEAD, Cell Signaling Technology Cat#13295; RRID: AB\_2687902  
 Anti-FLAG, Sigma Cat#F7425; RRID: AB\_439687  
 Anti-HA, Santa Cruz Biotechnology Cat#sc-7392; RRID: AB\_627809  
 Anti-cyclophilin B, ThermoFisher Scientific Cat#PA1-027A; RRID: AB\_2169138  
 Anti-YAP, Cell Signaling Technology Cat#14074; RRID: AB\_2650491  
 Anti-histone H3, Cell Signaling Technology Cat#9715; RRID: AB\_331563  
 Anti-Lamin B1, Cell Signaling Technology Cat#12586; RRID: AB\_2650517  
 Anti-tubulin, Sigma Cat#T5168; RRID: AB\_477579  
 Anti-HSP90, BD Biosciences Cat#610419; RRID: AB\_397799  
 Anti-GAPDH, ThermoFisher Scientific Cat#MA5-15738; RRID: AB\_10977387  
 Anti-HA, Abcam Cat#ab9110; RRID: AB\_307019

Anti-TEAD1, BD Biosciences Cat#610922; RRID: AB\_398237

Anti-PyMT, Abcam Cat#ab15085; RRID: AB\_301631

## Validation

Pre-validated antibodies were purchased from reputable sources. All proteins are well studied and all antibodies are widely used in the literature. The catalog number and RRID are provided for each antibody. We validated the antibodies for endogenous and transfected proteins in knockdown and overexpression settings.

## Eukaryotic cell lines

Policy information about [cell lines](#)

## Cell line source(s)

MCF10A, ATCC CRL-10317; RRID: CVCL\_0598  
 T47D, ATCC HTB-133; RRID: CVCL\_0553  
 BT474, ATCC HTB-20; RRID: CVCL\_0179  
 MDA-MB-157, ATCC HTB-24; RRID: CVCL\_0618  
 BT549, ATCC HTB-122; RRID: CVCL\_1092  
 MDA-MB-468, ATCC HTB-132; RRID: CVCL\_0419  
 HCC1806, ATCC CRL-2335; RRID: CVCL\_1258  
 Hs578t, ATCC HTB-126; RRID: CVCL\_0332  
 MDA-MB-436, ATCC HTB-130; RRID: CVCL\_0623  
 HeLa, ATCC CCL-2; RRID: CVCL\_0030  
 SUM149, Stephen P. Ethier  
 SUM159, Stephen P. Ethier  
 4T1 (G418-resistant, luciferase-expressing), Mien-Chie Hung  
 MDA-MB-231, ATCC HTB-26; RRID: CVCL\_0062  
 LM2 (luciferase-expressing), Xiang Zhang  
 HEK293FT, ThermoFisher Scientific Cat#R70007; RRID: CVCL\_6911  
 67NR, Fred R. Miller  
 168FARN, Fred R. Miller  
 4TO7, Fred R. Miller  
 4T1, Fred R. Miller

## Authentication

Short tandem repeat (STR) profiling was done by ATCC and MD Anderson's Characterized Cell Line Core Facility.

## Mycoplasma contamination

Cell lines were tested for mycoplasma contamination with a mycoplasma detection kit and treated with Plasmocin for the prevention of mycoplasma contamination.

Commonly misidentified lines  
(See [ICLAC](#) register)

No cell lines used in this study are in the database of commonly misidentified cell lines.

## Animals and other organisms

Policy information about [studies involving animals](#); [ARRIVE guidelines](#) recommended for reporting animal research

## Laboratory animals

Species: mouse.

## Strains:

NSG mice, MD Anderson's internal supply  
 BALB/c mice, The Jackson Laboratory Stock#000651; RRID: IMSR\_JAX:000651  
 MMTV-PyMT mice (C57BL/6), William Muller  
 MMTV-PyMT mice (FVB), The Jackson Laboratory Stock#002374; RRID: IMSR\_JAX:002374  
 CMV-Cre mice (C57BL/6), The Jackson Laboratory Stock#006054; RRID: IMSR\_JAX:006054  
 Malat1 knockout mice (transcriptional terminator insertion at the Malat1 locus; C57BL/6), Shinichi Nakagawa  
 Malat1 transgenic mice (targeted transgenic expression from the ROSA26 locus; C57BL/6 and FVB), generated in this study

Age: (1) for tumor cell implantation: 6 weeks old at the time of tumor cell injection. (2) For genetically engineered mouse models: from birth to the endpoint (i.e., moribund due to tumor burdens or poor body condition).

Sex: female.

## Wild animals

The study did not involve wild animals.

## Field-collected samples

The study did not involve samples collected from the field.
